# Supplementary material for: Tuning the N-bonded cerium(iii) fraction/g-C3N4 interface in hollow structures using an in situ reduction treatment for superior photochemical hydrogen evolution
Source: Royal Society of Chemistry journal article supplement (doi:10.1039/c9cy01305a), 2019-01-01
Supplement: c9cy01305a1.pdf [file c9cy01305a1.pdf]

**Tuning the N-bonded cerium (III) fraction /g-C<sub>3</sub>N<sub>4</sub> interfaces in hollow structures by an in-situ reduction treatment for superior photochemical hydrogen evolution**

*Muhammad Waqas<sup>a</sup>, Bo Yang<sup>a</sup>\*, Lujie Cao<sup>c</sup>, Xu Zhao<sup>b</sup>, Waheed Iqbal<sup>a</sup>, Ke Xiao<sup>a</sup>, Caizhen Zhu<sup>a</sup>, and Junmin Zhang<sup>a</sup>*

**Supporting Information**

**Figure S1 to S4**

**Table S1-S2**

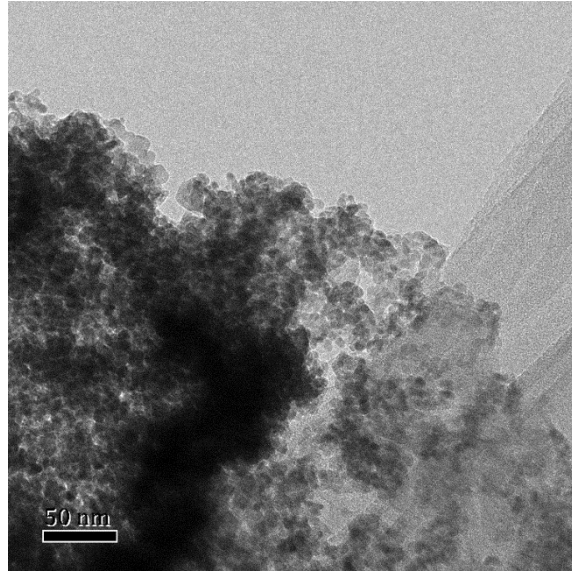

**Figure S1.** TEM image of the sample NCCN3-S<sup>2</sup> reveals the spherical shape CeO<sub>2-x</sub> particles having average size 6.01 nm, which is approximately consistent with the calculated particle size by utilizing Scherrer's equation.

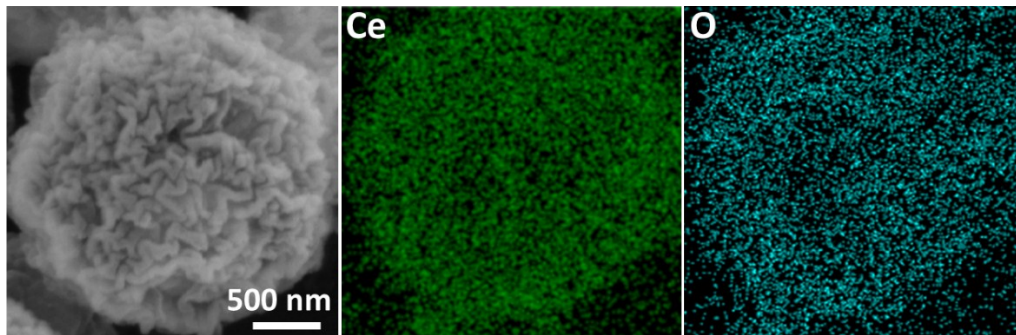

**Figure S2.** FE-SEM of the sample NCCN1-S<sup>1</sup> hollow structure

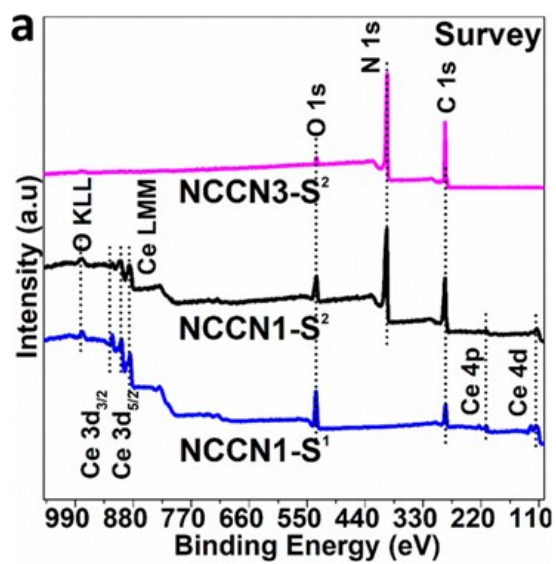

**Figure S3.** XPS survey spectra's for the as-synthesized NCCN1-S<sup>1</sup>, NCCN1-S<sup>2</sup> and NCCN3-S<sup>2</sup> hollow structures.

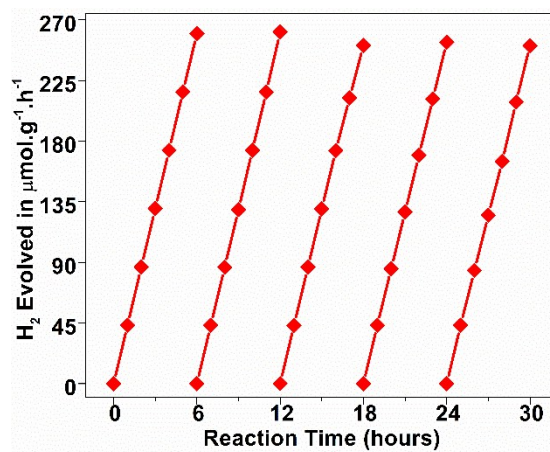

**Figure S4.** Recycling hydrogen production over NCCN3-S<sup>2</sup> photocatalyst ( $\lambda \geq 420$  nm), after each cycle the reactor was flushed with N<sub>2</sub> to evacuate residual H<sub>2</sub> gas.

**Table SI.** The XPS binding energies position, relative C1s, N1s, O1s surface functionalities, surface Ce (III) / (IV) fraction determined for NCCN1-S<sup>1</sup>, NCCN1-S<sup>2</sup>, and NCCN3-S<sup>2</sup> photocatalyst.

| Catalyst             | O 1s (eV)                             | N 1s (eV)                          | Ce 3d (eV)                    |                               | C 1s (eV)                                        | Ce <sup>3+</sup> /Ce <sup>4+</sup><br>At. % |
|----------------------|---------------------------------------|------------------------------------|-------------------------------|-------------------------------|--------------------------------------------------|---------------------------------------------|
|                      | %                                     | %                                  | 3d <sub>5/2</sub> %           | 3d <sub>3/2</sub> %           | %                                                |                                             |
| NCCN1-S <sup>1</sup> | 530.38<br>(Ad-O <sup>2-</sup> ) 48.4% | 401.38<br>(C-N) 100%               | 885.48<br>(Ce <sup>4+</sup> ) | 901.63<br>(Ce <sup>4+</sup> ) | 286.68<br>(C-O) 77.5%                            | 0                                           |
|                      | 531.95<br>(C-O) 27.6 %                |                                    | 891.03<br>(Ce <sup>4+</sup> ) | 909.23<br>(Ce <sup>4+</sup> ) | 288.55<br>(C=O) 15.1%                            |                                             |
|                      | 533.54<br>(Ad-H <sub>2</sub> O) 24 %  |                                    |                               | 918<br>(Ce <sup>4+</sup> )    | 290.33<br>(-CO <sub>3</sub> <sup>2-</sup> ) 7.2% |                                             |
|                      | O (35.14 %)                           | N (0.5 %)                          |                               |                               | C (50.5 %)                                       |                                             |
| NCCN1-S <sup>2</sup> | 531.32<br>(Ce-O <sup>2-</sup> ) 40.3% | 397.91<br>(Ce-N) 21.4%             | 883.6<br>(Ce <sup>3+</sup> )  | 900.97<br>(Ce <sup>3+</sup> ) | 284.8<br>(C=C) 9.3%                              | 85.43                                       |
|                      | 533.1<br>(C-O-C) 33.9%                | 399<br>(Ce-N <sub>2</sub> ) 29.7%  | 886.89<br>(Ce <sup>3+</sup> ) | 904.51<br>(Ce <sup>3+</sup> ) | 287.6<br>(O-C-O) 46%                             |                                             |
|                      | 534.79<br>(Ce-OH) 25%                 | 400.56<br>(N-C3) 38.6%             | 890.13<br>(Ce <sup>3+</sup> ) | 908.03<br>(Ce <sup>4+</sup> ) | 289.4<br>(O-C=N) 44%                             |                                             |
|                      | O (8.57 %)                            | 402.85<br>(N-O) 10.3%              |                               | 918<br>(Ce <sup>4+</sup> )    | C (16.5 %)                                       |                                             |
| NCCN3-S <sup>2</sup> | 530.6<br>(Ce-O) 18.7%                 | 398.57<br>(C=N-C) 66%              | 882.1.<br>(Ce <sup>3+</sup> ) | 900.1<br>(Ce <sup>3+</sup> )  | 284.8<br>(C=C) 10.8%                             | 89                                          |
|                      | 532.19<br>(C=O) 49.7%                 | 400.34<br>(C-N-H) 28.3%            | 886.08<br>(Ce <sup>3+</sup> ) | 906.2<br>(Ce <sup>3+</sup> )  | 288.06<br>(N-C=N) 85%                            |                                             |
|                      | 533.52<br>(-H <sub>2</sub> O) 31.4%   | 404.39<br>(N <sup>+</sup> -C) 5.7% | 888.82<br>(Ce <sup>4+</sup> ) |                               | 293.37<br>(C-NH <sub>2</sub> ) 4.1%              |                                             |
|                      | O (2.86 %)                            | N (43.82 %)                        |                               |                               | C (38.6 %)                                       |                                             |

**Table S2.** The comparison of recently published g-C<sub>3</sub>N<sub>4</sub> based work for hydrogen evolution reactions.

| Catalyst                                                                  | Hole scavenger                                      | H <sub>2</sub><br><sup>-1 -1</sup><br>( $\mu\text{mol h}^{-1} \text{g}^{-1} \text{cat}$ ) | Wavelength<br>(nm) | Reference |
|---------------------------------------------------------------------------|-----------------------------------------------------|-------------------------------------------------------------------------------------------|--------------------|-----------|
| CeO <sub>2</sub> /g-C <sub>3</sub> N <sub>4</sub> /Pt                     | Lactate                                             | 73.12                                                                                     | > 420              | S1        |
| Rod CeO <sub>2</sub> /g-C <sub>3</sub> N <sub>4</sub> /Pt                 | TEOA                                                | 1100                                                                                      | > 420              | S2        |
| TiO <sub>2</sub> -B-doped g-C <sub>3</sub> N <sub>4</sub>                 | Methanol                                            | 150                                                                                       | > 420              | S3        |
| Ni(OH) <sub>2</sub> g-CN                                                  | TEOA                                                | 152                                                                                       | > 420              | S4        |
| WS <sub>2</sub> -g-CN                                                     | Lactic acid                                         | 240                                                                                       | > 420              | S5        |
| Ni <sub>2</sub> P- g-CN                                                   | TEOA                                                | 183.6                                                                                     | > 420              | S6        |
| N-TCN-700                                                                 | Methanol                                            | 296.4                                                                                     | > 420              | S7        |
| NiS- g-CN                                                                 | TEOA                                                | 482                                                                                       | > 440              | S8        |
| 20 wt % ZnS/g-C <sub>3</sub> N <sub>4</sub>                               | Na <sub>2</sub> S / Na <sub>2</sub> SO <sub>3</sub> | 713.68                                                                                    | > 420              | S9        |
| C-ZrO <sub>2</sub> /g-C <sub>3</sub> N <sub>4</sub> /20%Ni <sub>2</sub> P | TEOA                                                | 10040                                                                                     | > 420              | S10       |
| 0.5 wt% Cu <sub>3</sub> P/g-C <sub>3</sub> N <sub>4</sub>                 | TEOA                                                | 808                                                                                       | > 420              | S11       |
| N-CeO <sub>2-x</sub> /g-C <sub>3</sub> N <sub>4</sub> Hollow structure    | Methanol                                            | 43.32                                                                                     | > 420              | This work |

## References

1. N. Tian, H. Huang, C. Liu, F. Dong, T. Zhang, X. Du, S. Yu and Y. Zhang, *J. Mater. Chem. A*, 2015, **3**, 17120-17129.
2. W. Zou, B. Deng, X. Hu, Y. Zhou, Y. Pu, S. Yu, K. Ma, J. Sun, H. Wan and L. Dong, *Appl Catal. B. Environ*, 2018, **238**, 111-118.
3. F. Raziq, Y. Qu, X. Zhang, M. Humayun, J. Wu, A. Zada, H. Yu, X. Sun and L. Jing, *The Journal of Phys Chem C*, 2015, **120**, 98-107.
4. J. Yu, S. Wang, B. Cheng, Z. Lin and F. Huang, *Catal. Sci. Technol*, 2013, **3**, 1782-1789.
5. Y. Hou, Y. Zhu, Y. Xu and X. Wang, *Appl Catal. B. Environ*, 2014, **156**, 122-127.
6. Y. Chen and Z. Qin, *Catal. Sci. Technol*, 2016, **6**, 8212-8221.
7. X. Shi, M. Fujitsuka, Z. Lou, P. Zhang and T. Majima, *J. Mater. Chem. A*, 2017, **5**, 9671-9681.
8. J. Hong, Y. Wang, Y. Wang, W. Zhang and R. Xu, *ChemSusChem*, 2013, **6**, 2263-2268.
9. X. Hao, J. Zhou, Z. Cui, Yicong Wang, Y. Wang, and Z. Zou, *Appl Catal. B. Environ*, 2018, **229**, 41-51.
10. J. Xu, J. Gao, Y. Qi, C. Wang, and L. Wang, *ChemCatChem*, 2018, **15**, 3327-3335.
11. S. Hua, D. Qu, L. An, W. Jiang, Y. Wen, X. Wang, Z. Sun, *Appl Catal. B. Environ*, 2019, **240**, 253-261.
